# Supplementary material
Source: PubMed Central journal article supplement (PMC4907843)
Supplement: NIHMS773794-supplement-Supp_Info.pdf [file NIHMS773794-supplement-Supp_Info.pdf]

## **SUPP. MATERIALS AND METHODS**

### **DNA constructs**

Human *GNPTG*-FLAG (NM\_032520.3) in pcDNA3.1(+) (Qian, et al., 2015) was modified by QuikChange site-directed mutagenesis to generate the variants p.G106S, p.G126S, p.C142Y and p.T286M. See Supp. Table S1 for the primer sequences. All mutations were confirmed by Sanger sequencing. Human *GNPTAB*-V5/His in pcDNA6 is described in Qian, et al., 2013.

### **Cell lines**

*GNPTG*<sup>-/-</sup> HeLa cells were generated by CRISPR/Cas9-induced targeted double strand break as described (van Meel, et al., 2016). *GNPTG*<sup>-/-</sup> HeLa cells, control HeLa cells and HEK293 cells were maintained in DMEM (Mediatech) containing 110 mg/L sodium pyruvate and 4.5 g/L glucose, supplemented with 10% (vol/vol) FBS (Atlanta Biologicals), 100,000 U/L penicillin, 100 mg/L streptomycin (Life Technologies) and 2 mM L-glutamine (Mediatech).

### **Immunofluorescence microscopy**

HeLa cells were transfected with WT or mutant human *GNPTG*-FLAG in pcDNA3.1(+) and human *GNPTAB*-V5/His in pcDNA6 in a 1 to 8 ratio using Lipofectamine® 3000 (Life Technologies), according to the manufacturer's protocol. The cells were fixed and stained for confocal immunofluorescence microscopy ~48h later (Qian, et al., 2013). The  $\gamma$  subunit was detected with antiserum generated to human  $\gamma$  GlcNAc-1-phosphotransferase (kind gift from Dr. T. Braulke), dilution 1:200; the  $\alpha\beta$  subunits with anti-V5 (Life Technologies/Novex), dilution 1:1000; mouse anti-GM130 (1:500) was from BD Transduction Laboratories and mouse anti-calnexin (1:150) from Millipore.

**Analysis of N-linked glycans and Western blotting**

HEK293 cells were transfected with the  $\alpha\beta$  and  $\gamma$  subunits of GlcNAc-1-phosphotransferase as described above. Approximately 48h after transfection the cells were lysed in 1% Triton X-100/PBS containing a protease inhibitor cocktail (Complete, Roche Diagnostics). To analyze the N-linked glycans, 20  $\mu\text{g}$  of total protein in the cell lysates was treated for 3h at 37°C with neuraminidase, endoglycosidase H<sub>f</sub> or N-glycosidase F as described (van Meel, et al., 2014). In all Western blots, 15-30  $\mu\text{g}$  cell lysate in Laemmli sample buffer (with or without 0.1 M dithiothreitol (Sigma)) was subjected to SDS-PAGE and immunoblotting (van Meel, et al., 2014). The  $\gamma$  subunit was detected with mouse anti-FLAG M2 antibody (Stratagene), the  $\alpha\beta$  subunits with mouse anti-V5 (Life Technologies) and rabbit anti- $\alpha$ -tubulin (Abcam) antibody was used to check equal protein loading.

**Rescue of *GNPTG*<sup>-/-</sup> HeLa cells**

*GNPTG*<sup>-/-</sup> HeLa cells were transferred to 6-well plates and transfected with 100-500 ng DNA at ~60% confluency as described. The intracellular activities of a panel of lysosomal acid glycosidases were determined 3 days later using 1 mM 4-methylumbelliferyl-conjugated specific substrates (Sigma) in 50 mM sodium citrate buffer containing 0.5% Triton X-100 (pH 4.6) as described (Lee, et al., 2007). The enzyme activities were normalized to the total protein concentration of the cell lysates. In the case of the WT  $\gamma$  subunit, transfection with 100 ng DNA resulted in a maximum increase in intracellular lysosomal enzyme activities. The mutants were expressed at similar or higher levels as confirmed by Western blotting.

**Supp. Table S1. Primer sequences used in QuikChange site-directed mutagenesis**

| Variant               | Forward primer (5' → 3')                                                      | Reverse primer (5' → 3')                                                      |
|-----------------------|-------------------------------------------------------------------------------|-------------------------------------------------------------------------------|
| c.316G>A<br>(p.G106S) | TAC AGT GGG ATC CTC AGC<br>ATC TGG CAC GAG TGG G                              | CCC ACT CGT GCC AGA TGC<br>TGA GGA TCC CAC TGT A                              |
| c.376G>A<br>(p.G126S) | CCT TCA CGG GCA TGT GGA<br>TGA GGG ACA GTG ACG CCT<br>GCC GTT CCC GGA GCC GGC | GCC GGC TCC GGG AAC GGC<br>AGG CGT CAC TGT CCC TCA<br>TCC ACA TGC CCG TGA ACC |
| c.425G>A<br>(p.C142Y) | GCA AGG TGG AGC TGG CGT<br>ATG GAA AAA GCA ACC G                              | CGG TTG CTT TTT CCA TAC<br>GCC AGC TCC ACC TTG C                              |
| c.857C>T<br>(p.T286M) | CAC TTG GGC CAC GAG ATG<br>CCC AGA GCC AAG TC                                 | GAC TTG GCT CTG GGC ATC<br>TCG TGG CCC AAG TG                                 |

Note that the nucleotide numbering uses +1 as the A of the ATG translation initiation codon in the reference sequence, with the initiation codon as codon 1.
